# Supplementary material for: A Comparative Multi-Frequency EPR Study of Dipolar Interaction in Tetra-Heme Cytochromes
Source: MDPI journal article supplement (doi:10.3390/ijms241612713), 2023-08-12

**Supplementary Material with**  
**A comparative multi-frequency EPR study of dipolar interaction in tetra-**  
**heme cytochromes**

By Wilfred R. Hagen and Ricardo O. Louro

**Figures S1–S4.** Simulations, based on Equation 1, of EPR from *S. oneidensis* small tetraheme cytochrome, STC, and *D. vulgaris* cytochrome  $c_3$  at intermediate (3 GHz) and low (0.7 GHz) frequency. The simulations take into account crystallographic structural information on the Fe-Fe distances and the relative orientation of the hemes. Superhyperfine interaction from  $^{14}\text{N}$  and  $^1\text{H}$  nuclei is accounted for by convolution with a Gaussian line of 3.91 gauss width (HWHH). The simulations cover all 24 possible assignments of the four spectral components (Table 1) to the four hemes (Figure 7). Figure S1 is for STC at 2974 MHz; Figure S2 is for STC at 639 MHz; Figure S3 is for  $c_3$  at 2871 MHz; Figure S4 is for  $c_3$  at 627 MHz.

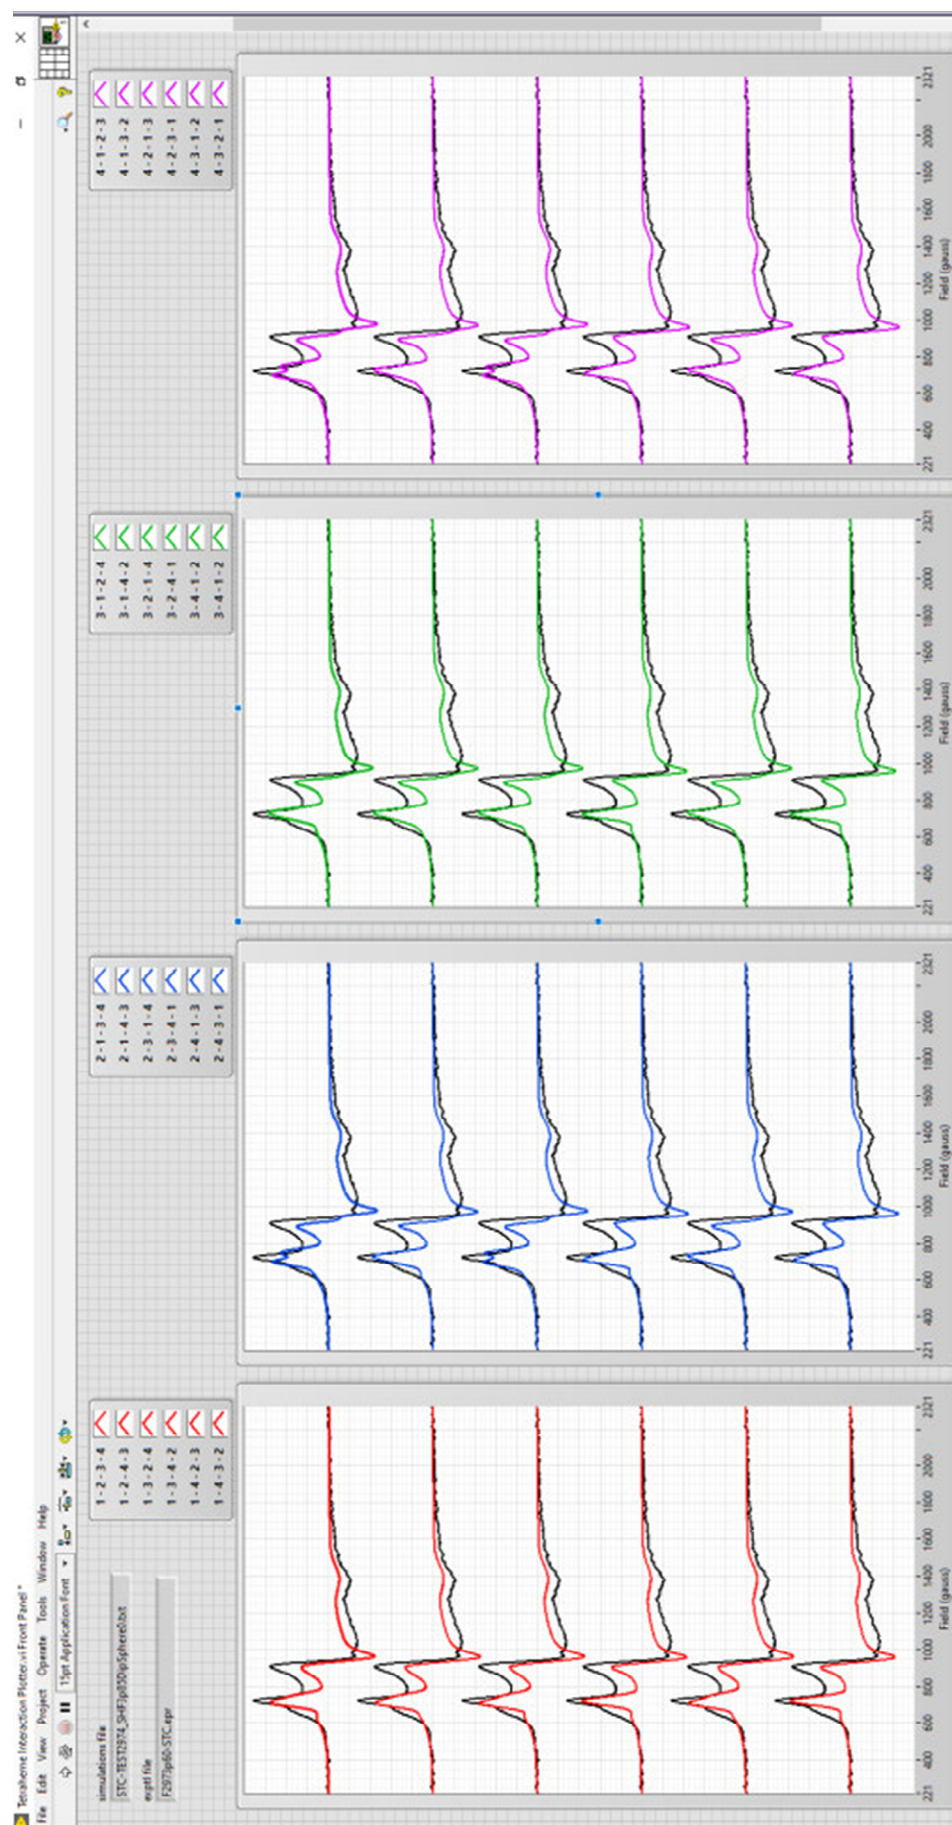

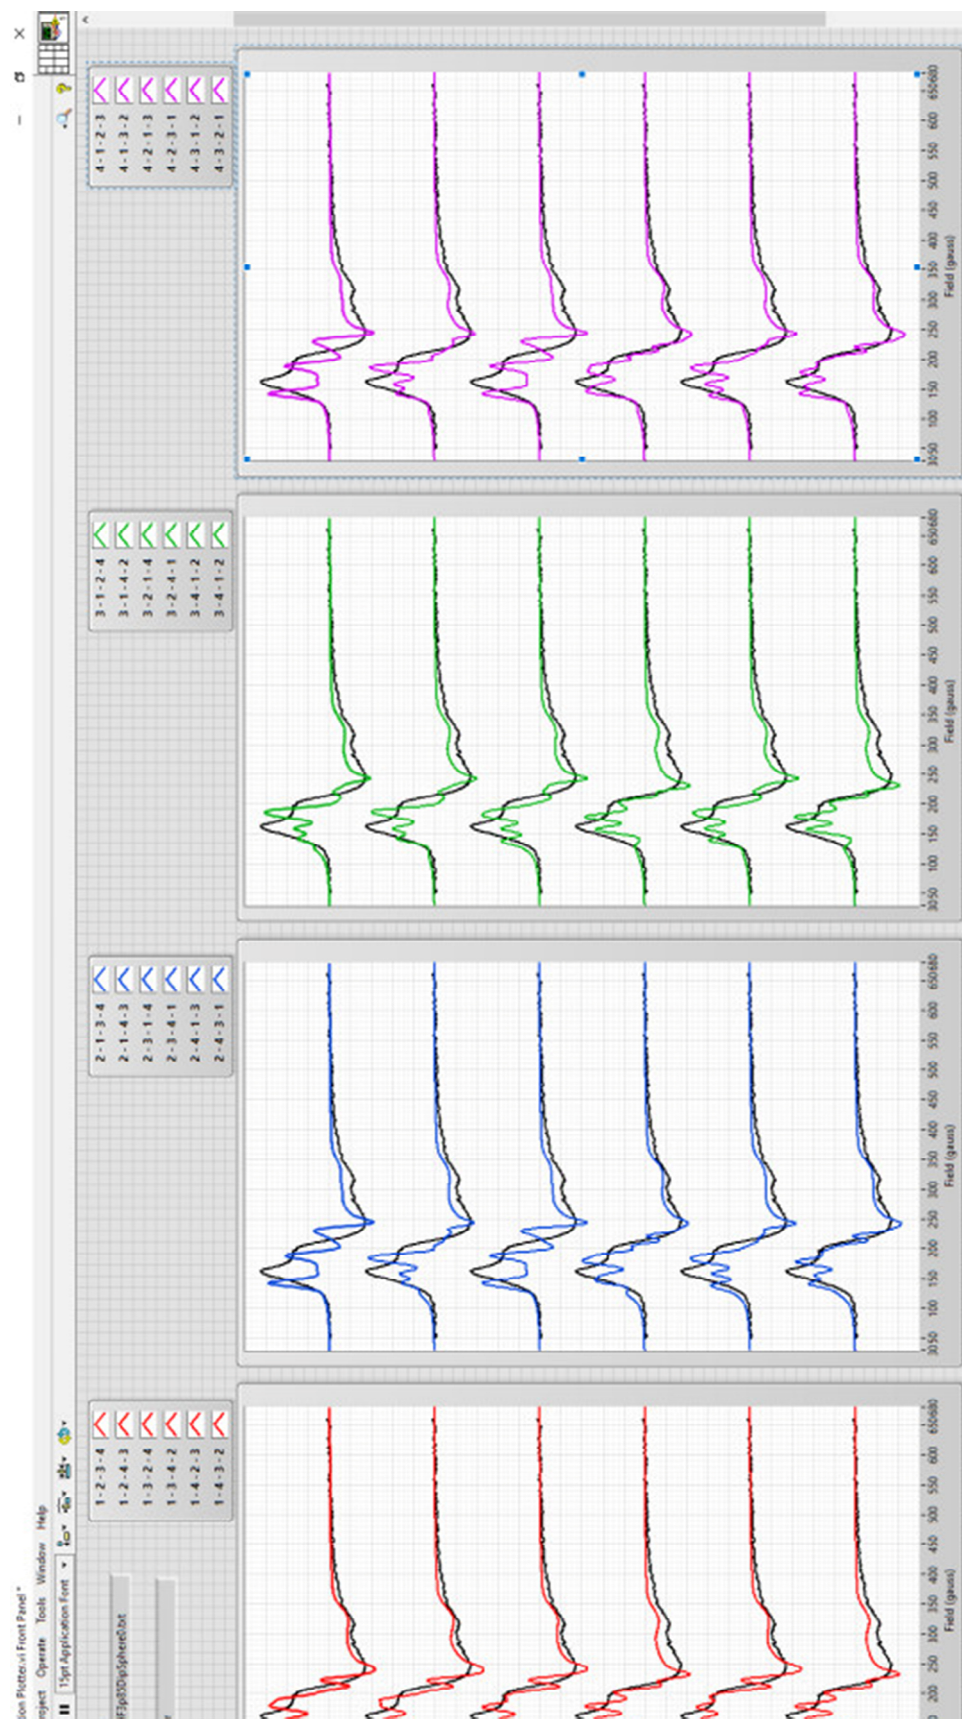

Supplement: s1 [file s1]
